# Supplementary material for: Folic acid modified superparamagnetic iron oxide nanocomposites for targeted hepatic carcinoma MR imaging
Source: Royal Society of Chemistry journal article supplement (doi:10.1039/c3ra45878d), 2013-11-22
Supplement: c3ra45878d.pdf [file c3ra45878d.pdf]

## Supporting Information

### Folic acid modified superparamagnetic iron oxide nanocomposites for targeted hepatic carcinoma MR imaging

Zhongling Wang, Jing Zhu, Yinyin Chen, Kaiming Geng, Nong Qian, Liang Cheng, Ziwei Lu, Yue Pan, Liang Guo\*, Yonggang Li\*, Hongwei Gu\*

Table S1 Properties of nanoparticles materials

| Nanocomposites     | size (nm) | T <sub>2</sub> values |      | r <sub>2</sub><br>(sec <sup>-1</sup> ) |
|--------------------|-----------|-----------------------|------|----------------------------------------|
|                    |           | DLS                   | (ms) |                                        |
| IONP-DA-dextran-FA | 96        |                       | 10.9 | 91.7                                   |
| IONP-DA-dextran    | 89        |                       | 11.8 | 84.7                                   |

Table S2 MRI Intensity changes of Bel 7402 cells 1h after incubation with folic acid

| Folic acid<br>(mmol/L)    | 0mmol/L     | 0.5 mmol/L  | 1.0 mmol/L  | 1.5 mmol/L  | 2.0 mmol/L  |
|---------------------------|-------------|-------------|-------------|-------------|-------------|
| MRI signal<br>Intensities | 493.53      | 700.99      | 877.35      | 961.32      | 1013.37     |
| $\bar{x} \pm s$           | $\pm 38.97$ | $\pm 56.93$ | $\pm 46.72$ | $\pm 46.81$ | $\pm 77.91$ |

Intensity is presented as mean±standard deviation,SD. At final concentrations of 40ug/ml.

Table S3. MRI Intensity changes at different Fe concentrations for incubates Bel 7402 cells

| Groups     | IONP-DA-dextran-FA         | IONP-DA-dextran            |
|------------|----------------------------|----------------------------|
|            | Signal intensities         | Signal intensities         |
|            | $\bar{x} \pm s$            | $\bar{x} \pm s$            |
| Control    | 1446.17±88.91              | 1465.17±78.42              |
| 5μg/ml     | 1391.83±83.36              | 1439.83±76.31              |
| 10μg/ml    | 1095.83±81.17 <sup>b</sup> | 1397.33±72.49              |
| 20μg/ml    | 823.83±71.00 <sup>b</sup>  | 1358.17±69.05 <sup>a</sup> |
| 40μg/ml    | 448.33±59.41 <sup>b</sup>  | 1157.17±63.22 <sup>b</sup> |
| 80μg/ml    | 155.00±41.09 <sup>b</sup>  | 901.50±55.37 <sup>b</sup>  |
| Stat.value | F= 305.05                  | F=58.92                    |
| P value    | P<0.01                     | P<0.01                     |

a, P<0.05; b, P<0.01. Signal intensities change is significant compared with the control group. Rate of signal intensity variety of two groups were -89.76% (b) and -37.92% (a) respectively. Rate of signal intensity variety is calculated as (Postinjection-Preinjection)/Preinjection × 100%. Intensity is presented as mean±standard deviation,SD

Table S4.

| <b>Time</b> | <b>Experiment group</b> |                |                 |                |                 | <b>Control group</b> |                 |                |  |
|-------------|-------------------------|----------------|-----------------|----------------|-----------------|----------------------|-----------------|----------------|--|
|             | $SI_T$                  |                | $SI_S$          |                |                 | $SI_T$               |                 | $SI_S$         |  |
|             | $\bar{x} \pm s$         | <i>P value</i> | $\bar{x} \pm s$ | <i>P value</i> | $\bar{x} \pm s$ | <i>P value</i>       | $\bar{x} \pm s$ | <i>P value</i> |  |
| Pre.        | 2601.67±195.60          | —              | 792.50±81.58    | —              | 2418.00±97.39   | —                    | 838.33±71.72    | —              |  |
| Post.0.5h   | 2067.67±123.17          | <0.01**        | 669.17±79.11    | <0.01**        | 1856.00±107.76  | <0.01**              | 739.17±68.88    | 0.03*          |  |
| Post. 1h    | 1935.17±76.91           | <0.01**        | 615.50±59.77    | <0.01**        | 1929.17±96.16   | <0.01**              | 730.33±73.02    | 0.02*          |  |
| Post. 2h    | 1607.00±92.01           | <0.01**        | 599.00±55.58    | <0.01**        | 1893.00±100.13  | <0.01**              | 699.50±58.87    | <0.01**        |  |
| Post. 4h    | 1546.50±101.58          | <0.01**        | 736.83±29.73    | 0.06           | 2273.50±98.12   | <0.01**              | 729.50±98.31    | 0.02*          |  |
| Post. 8h    | 1443.17±69.63           | <0.01**        | 775.00±17.79    | 0.55           | 2372.83±63.96   | 0.36                 | 780.33±83.77    | 0.20           |  |
| Post. 12h   | 1467.50±109.09          | <0.01**        | 751.50±23.87    | 0.16           | 2344.33±43.28   | 0.14                 | 799.83±62.55    | 0.39           |  |
| Post. 18h   | 1138.83±131.44          | <0.01**        | 749.17±26.69    | 0.14           | 2349.67±50.89   | 0.17                 | 813.83±96.58    | 0.58           |  |
| Post. 24h   | 1070.83±151.52          | <0.01**        | 764.83±26.86    | 0.35           | 2394.00±71.29   | 0.62                 | 804.67±71.34    | 0.45           |  |

Intensity is presented as mean±standard deviation,SD

$SI_T$  = T<sub>2</sub> signal intensities of tumor       $SI_S$  = T<sub>2</sub> signal intensities of muscle

T<sub>2</sub> signal intensities of preinjection compared with postinjection , \**P* values less than 0.05 or

\*\**P* values less than 0.01 were considered be statistically significant
